# Supplementary material for: Aberrant HPO Axis Alterations and Autoimmune Abnormalities in PCOS Patients with DOR: A Retrospective Analysis
Source: MDPI journal article supplement (doi:10.3390/jcm12165212), 2023-08-10
Supplement: s1 [file s1]

## *Supplementary Material*

### Supplementary Tables

**Table S1.** Characteristics of systemic diseases and family history of patients in Table1

|                                      | PCOS without<br>DOR(n=1757) | PCOS with DOR<br>(n=550) |
|--------------------------------------|-----------------------------|--------------------------|
| Systemic diseases — no. (%)          |                             |                          |
| Diabetes                             | 43 (2.45)                   | 13 (2.36)                |
| Hypertension                         | 11 (0.63)                   | 3 (0.55)                 |
| Chronic liver disease                | 70 (3.98)                   | 4 (0.73)                 |
| Chronic kidney disease               | 1 (0.06)                    | 1 (0.18)                 |
| Autoimmune diseases                  | 116 (6.60)                  | 41 (7.45)                |
| Family history of Diabetes — no. (%) |                             |                          |
| No                                   | 1170 (66.59)                | 390 (70.91)              |
| First-degree relatives               | 262 (14.91)                 | 68 (12.36)               |
| Second-degree relatives              | 316 (17.99)                 | 92 (16.73)               |
| First and second-degree relatives    | 9 (0.51)                    | 0 (0)                    |

**Table S2.** Multiple linear regression among FSH, BMI and metabolic parameters in PCOS patients with DOR

| Parameters           | $\beta_1$   | $\beta_2$  | Multiple R | R squared | Adjusted R squared |
|----------------------|-------------|------------|------------|-----------|--------------------|
|                      | FSH         | BMI        |            |           |                    |
| Waist/hip ratio      | -0.001      | 0.009****  | 0.596      | 0.355     | 0.350              |
| LH, IU/L             | 2.759****   | -0.215     | 0.519      | 0.270     | 0.267              |
| E2, pmol/L           | -29.200**** | -3.322     | 0.258      | 0.066     | 0.063              |
| Prolactin, $\mu$ g/L | -0.158      | 0.185*     | 0.137      | 0.019     | 0.015              |
| T, nmol/L            | 0.039**     | 0.004      | 0.139      | 0.019     | 0.016              |
| AD, ng/mL            | 0.040       | -0.014     | 0.104      | 0.011     | 0.006              |
| SHBG, nmol/L         | 0.080       | -3.014**** | 0.509      | 0.259     | 0.256              |
| FAI                  | 0.172       | 0.646****  | 0.447      | 0.200     | 0.196              |
| GLU, mmol/L          | 0.011       | 0.044****  | 0.289      | 0.083     | 0.080              |
| FINS, mIU/L          | -0.053      | 1.021****  | 0.686      | 0.471     | 0.469              |
| HOMA-IR              | -0.008      | 0.261****  | 0.638      | 0.407     | 0.405              |

|               |         |              |       |       |       |
|---------------|---------|--------------|-------|-------|-------|
| TC, mmol/L    | 0.0268* | 0.024**      | 0.156 | 0.024 | 0.020 |
| TG, mmol/L    | 0.018*  | 0.059****    | 0.455 | 0.207 | 0.204 |
| HDL-C, mmol/L | -0.003  | -0.03181**** | 0.519 | 0.269 | 0.257 |
| LDL-C, mmol/L | 0.010   | 0.04892****  | 0.305 | 0.093 | 0.089 |
| TSH, mIU/L    | -0.0001 | 0.04197**    | 0.134 | 0.018 | 0.014 |

Multiple linear regression analysis was performed with various endocrine and metabolic indicators as dependent variables, FSH (A) and BMI (B) as independent variables ( $Y = \beta_0 + \beta_1 * A + \beta_2 * B$ ). \* $p < 0.05$ , \*\* $p < 0.01$ , \*\*\* $p < 0.001$ , \*\*\*\* $p < 0.0001$ .

**Table S3. Clinical and biochemical data from PCOS patients with and without DOR for ELISA.**

|                        | PCOS without DOR(n=40) | PCOS with DOR(n=40) | P-value |
|------------------------|------------------------|---------------------|---------|
| Age, years             | 23.95 ± 5.07           | 25.35 ± 5.55        | 0.177   |
| BMI, kg/m <sup>2</sup> | 23.56 ± 4.41           | 24.60 ± 6.61        | 0.421   |
| Waist/hip ratio        | 0.82 ± 0.06            | 0.81 ± 0.07         | 0.425   |
| LH, IU/L               | 12.74 ± 10.09          | 20.89 ± 6.62        | <0.0001 |
| FSH, IU/L              | 6.73 ± 1.25            | 9.34 ± 2.45         | <0.0001 |
| E2, pmol/L             | 169.36 ± 48.07         | 203.75 ± 229.39     | 0.362   |
| Prolactin, µg/L        | 11.64 ± 4.34           | 14.30 ± 6.94        | 0.043   |
| T, nmol/L              | 3.02 ± 0.51            | 2.26 ± 0.82         | <0.0001 |
| AD, ng/mL              | 5.09 ± 0.74            | 3.65 ± 1.67         | <0.0001 |
| SHBG, nmol/L           | 30.52 ± 21.03          | 40.94 ± 28.80       | 0.071   |
| FAI                    | 14.69 ± 9.11           | 8.65 ± 6.97         | 0.001   |
| LH/FSH                 | 3.14 ± 1.00            | 1.28 ± 0.94         | <0.0001 |
| FSH/LH                 | 0.35 ± 0.09            | 1.70 ± 1.61         | <0.0001 |
| GLU, mmol/L            | 5.07 ± 0.44            | 5.09 ± 0.67         | 0.860   |
| FINS, mIU/L            | 10.19 ± 8.60           | 8.95 ± 8.11         | 0.506   |
| HOMA-IR                | 2.38 ± 2.20            | 2.03 ± 2.07         | 0.477   |
| TSH, mIU/L             | 2.28 ± 1.18            | 2.48 ± 1.81         | 0.582   |
| TC, mmol/L             | 4.68 ± 0.62            | 4.68 ± 0.86         | 0.985   |
| TG, mmol/L             | 1.03 ± 0.61            | 1.15 ± 0.72         | 0.428   |
| HDL-C, mmol/L          | 1.44 ± 0.30            | 1.40 ± 0.30         | 0.643   |
| LDL-C, mmol/L          | 2.79 ± 0.65            | 2.76 ± 0.77         | 0.831   |

Data are presented as mean ± SD. Student t-test was used in the analysis of the data (age) with normal distribution. Mann-Whitney test was used to compare differences between PCOS patients with and without DOR in non-normal distribution parameters.
